# Supplementary material for: Mesenchymal Stem Cells Alleviate Renal Fibrosis and Inhibit Autophagy via Exosome Transfer of miRNA-122a
Source: Hindawi journal article supplement (doi:10.1155/2022/1981798), 2022-07-07
Supplement: f1 [file 1981798.f1.pdf]

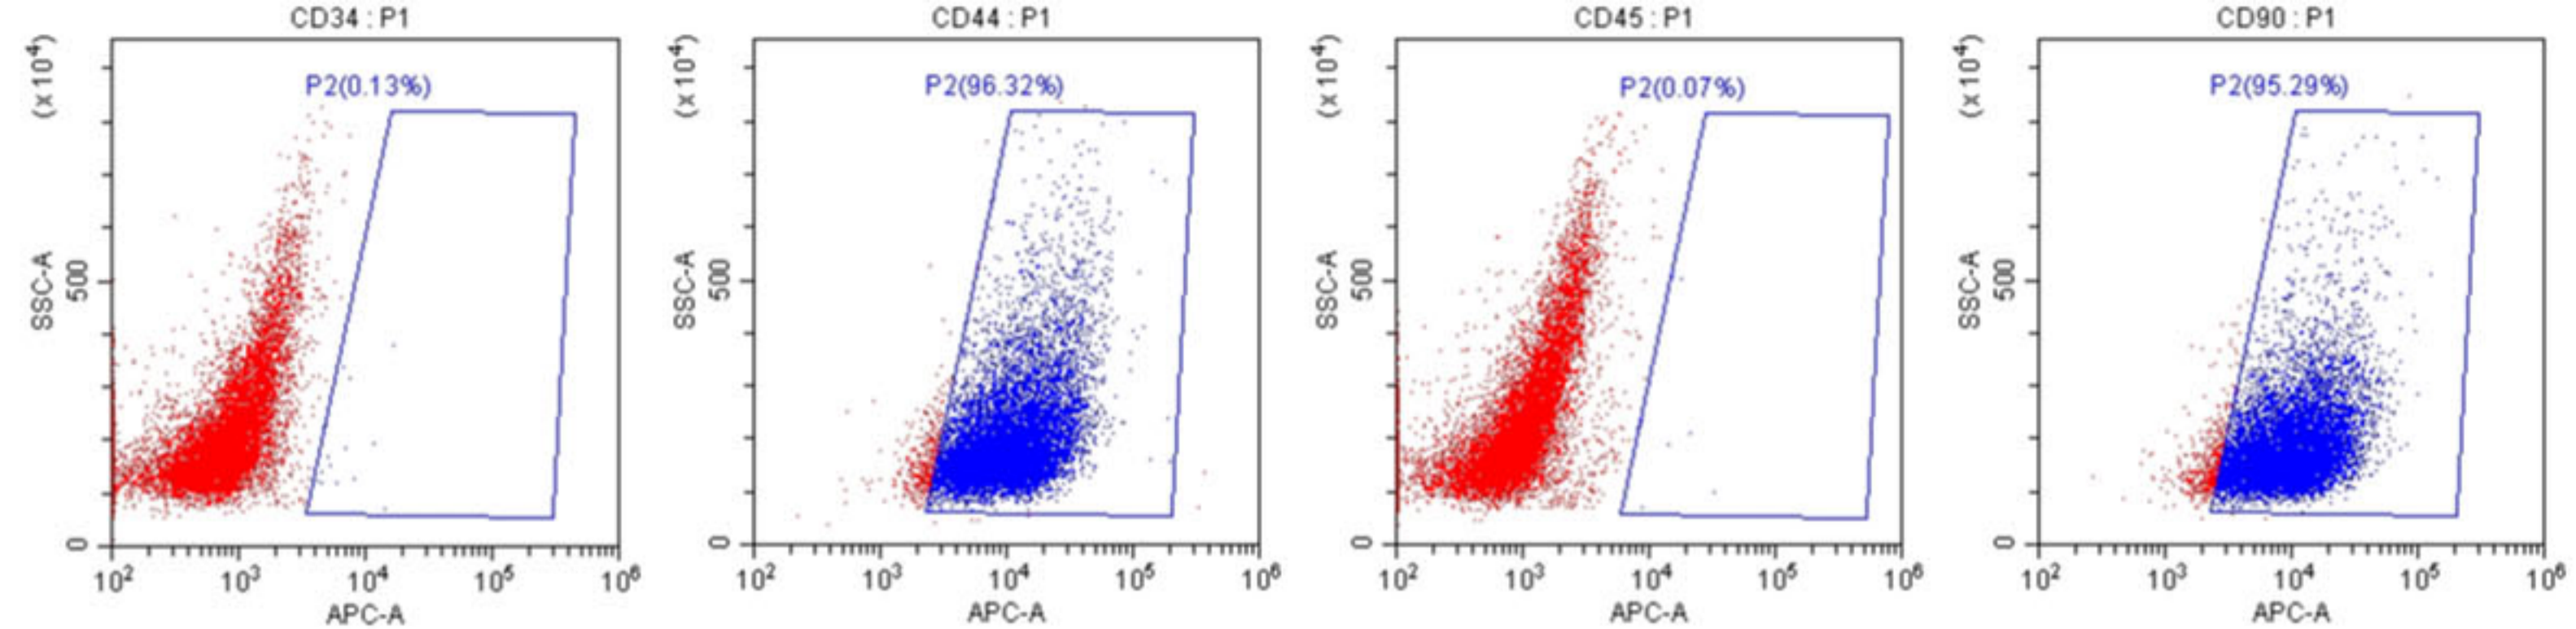

**A**

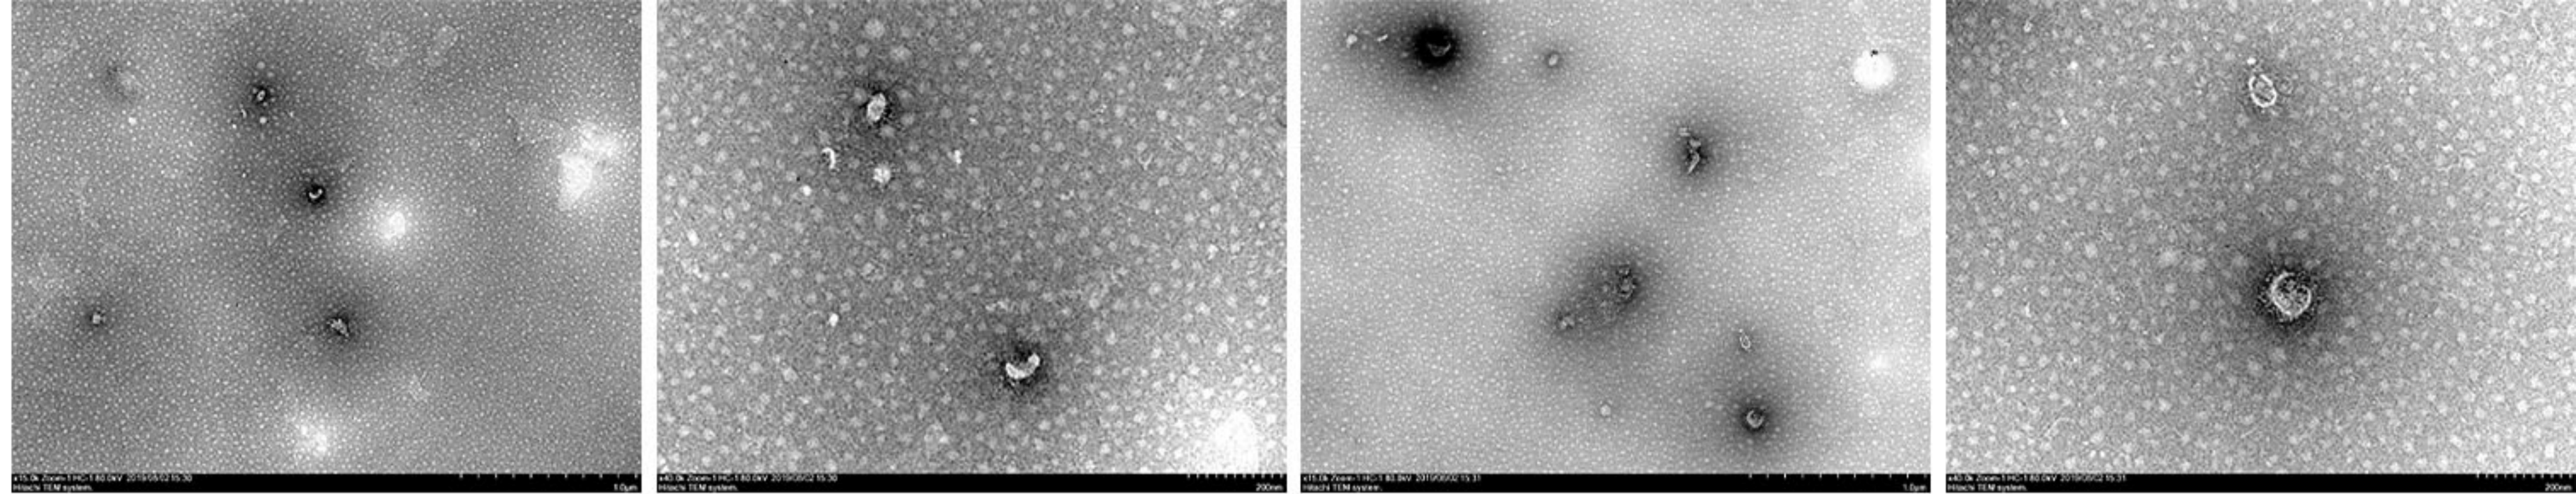

**B**

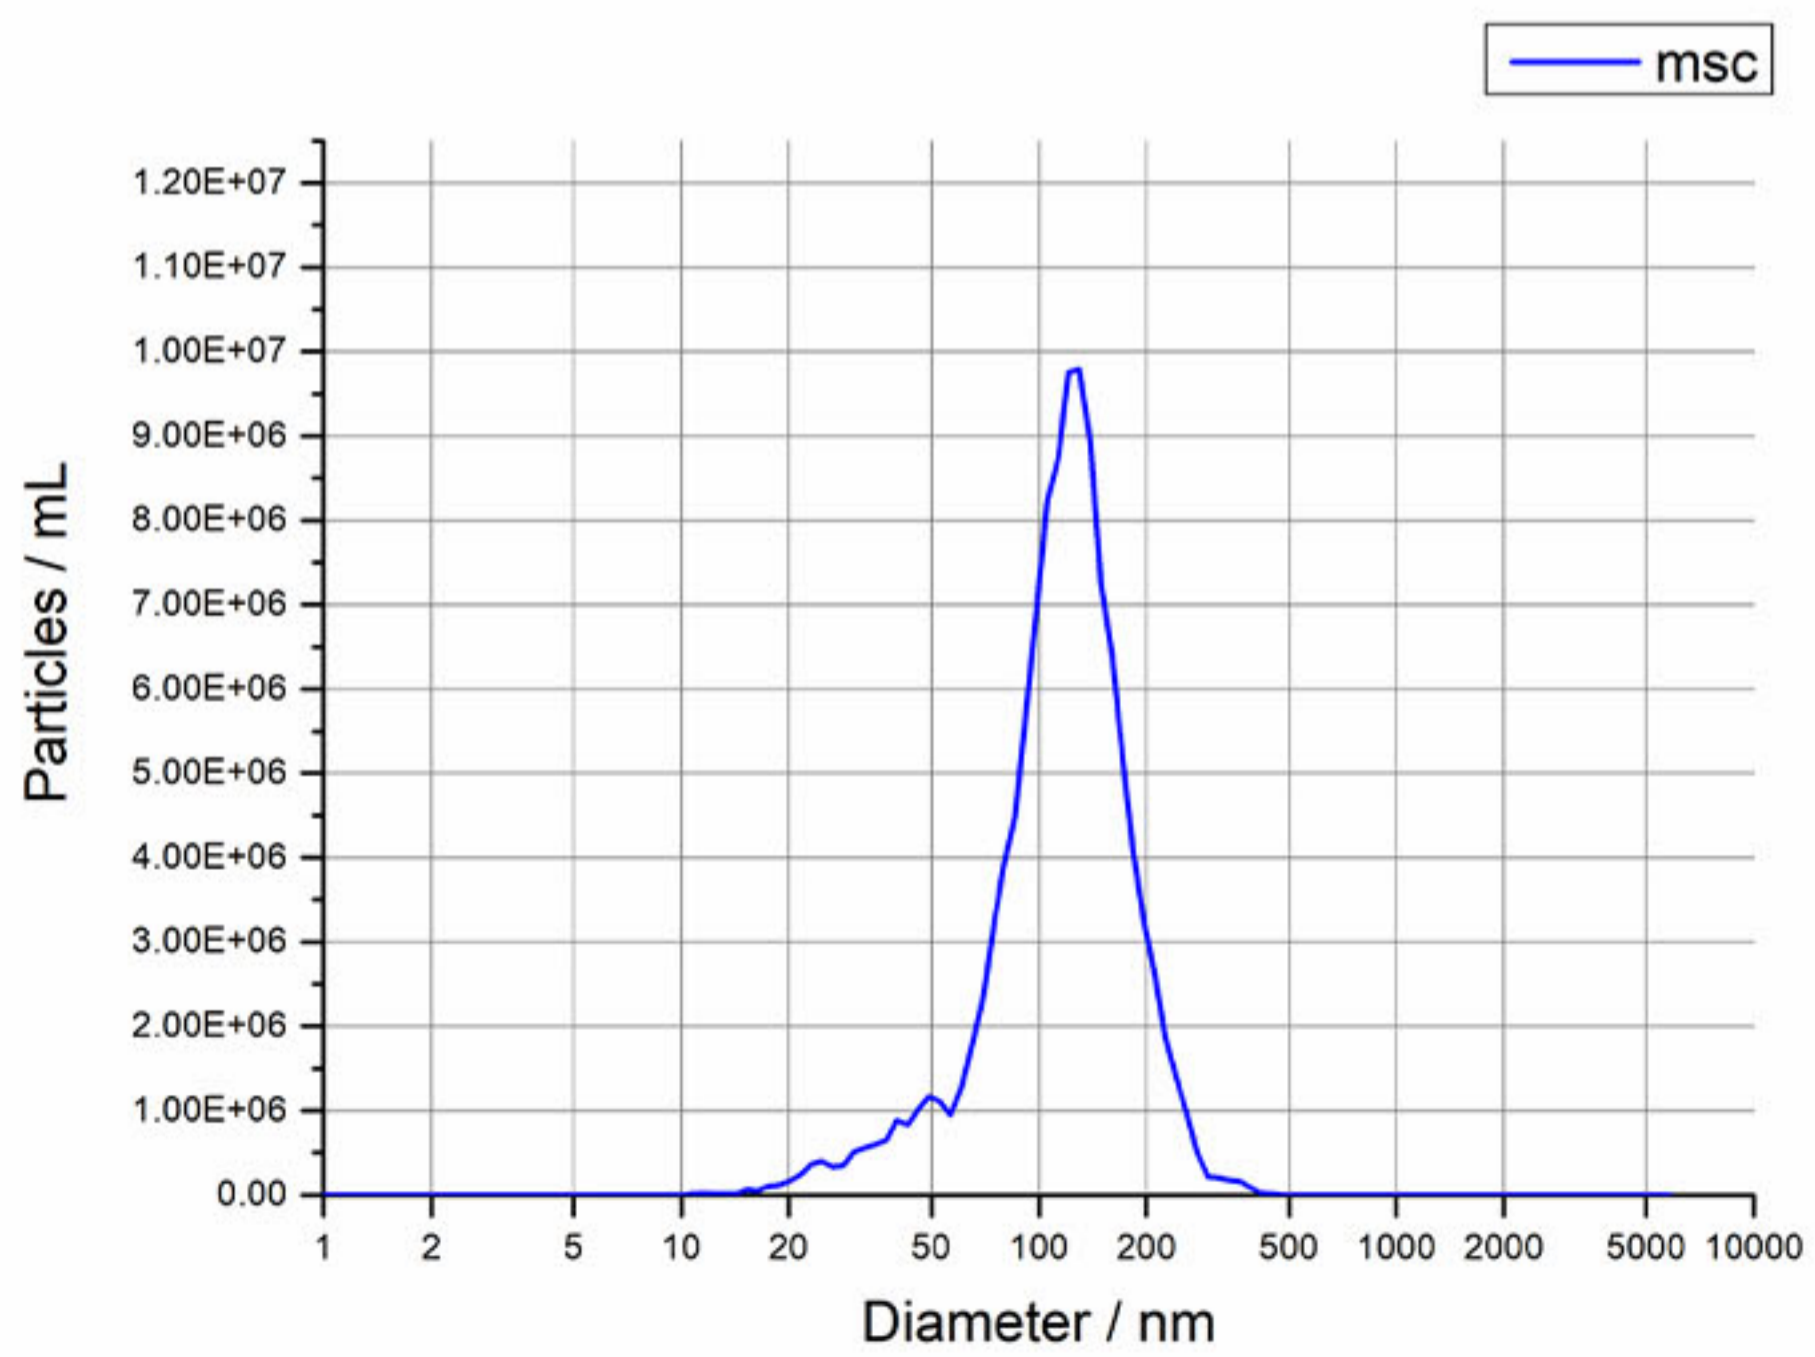

**C**

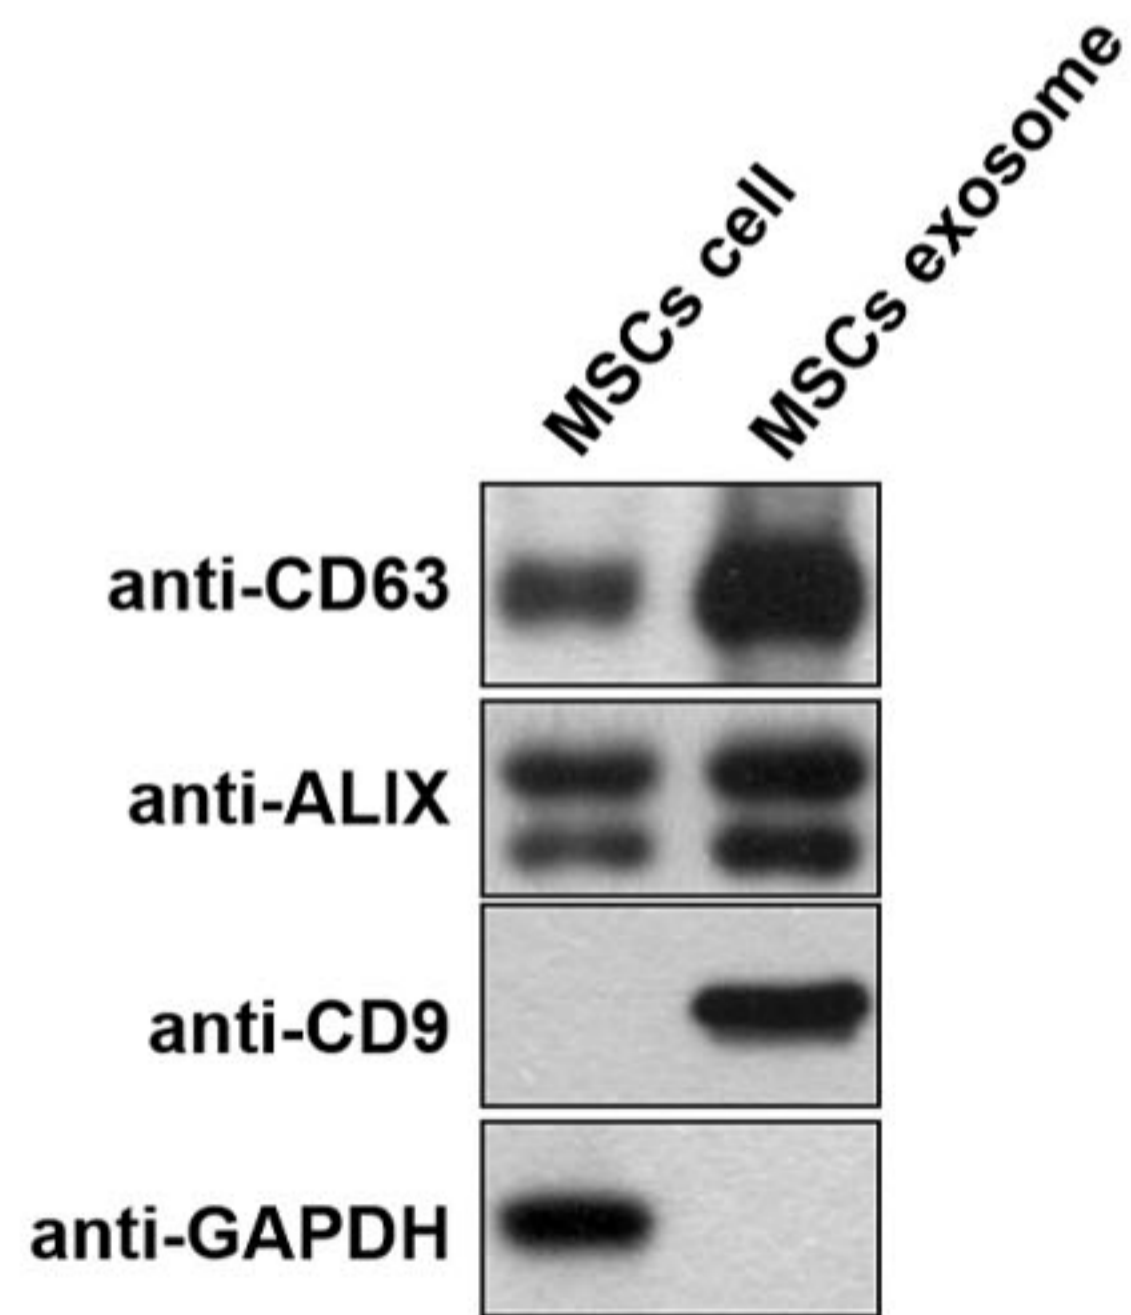

**D**

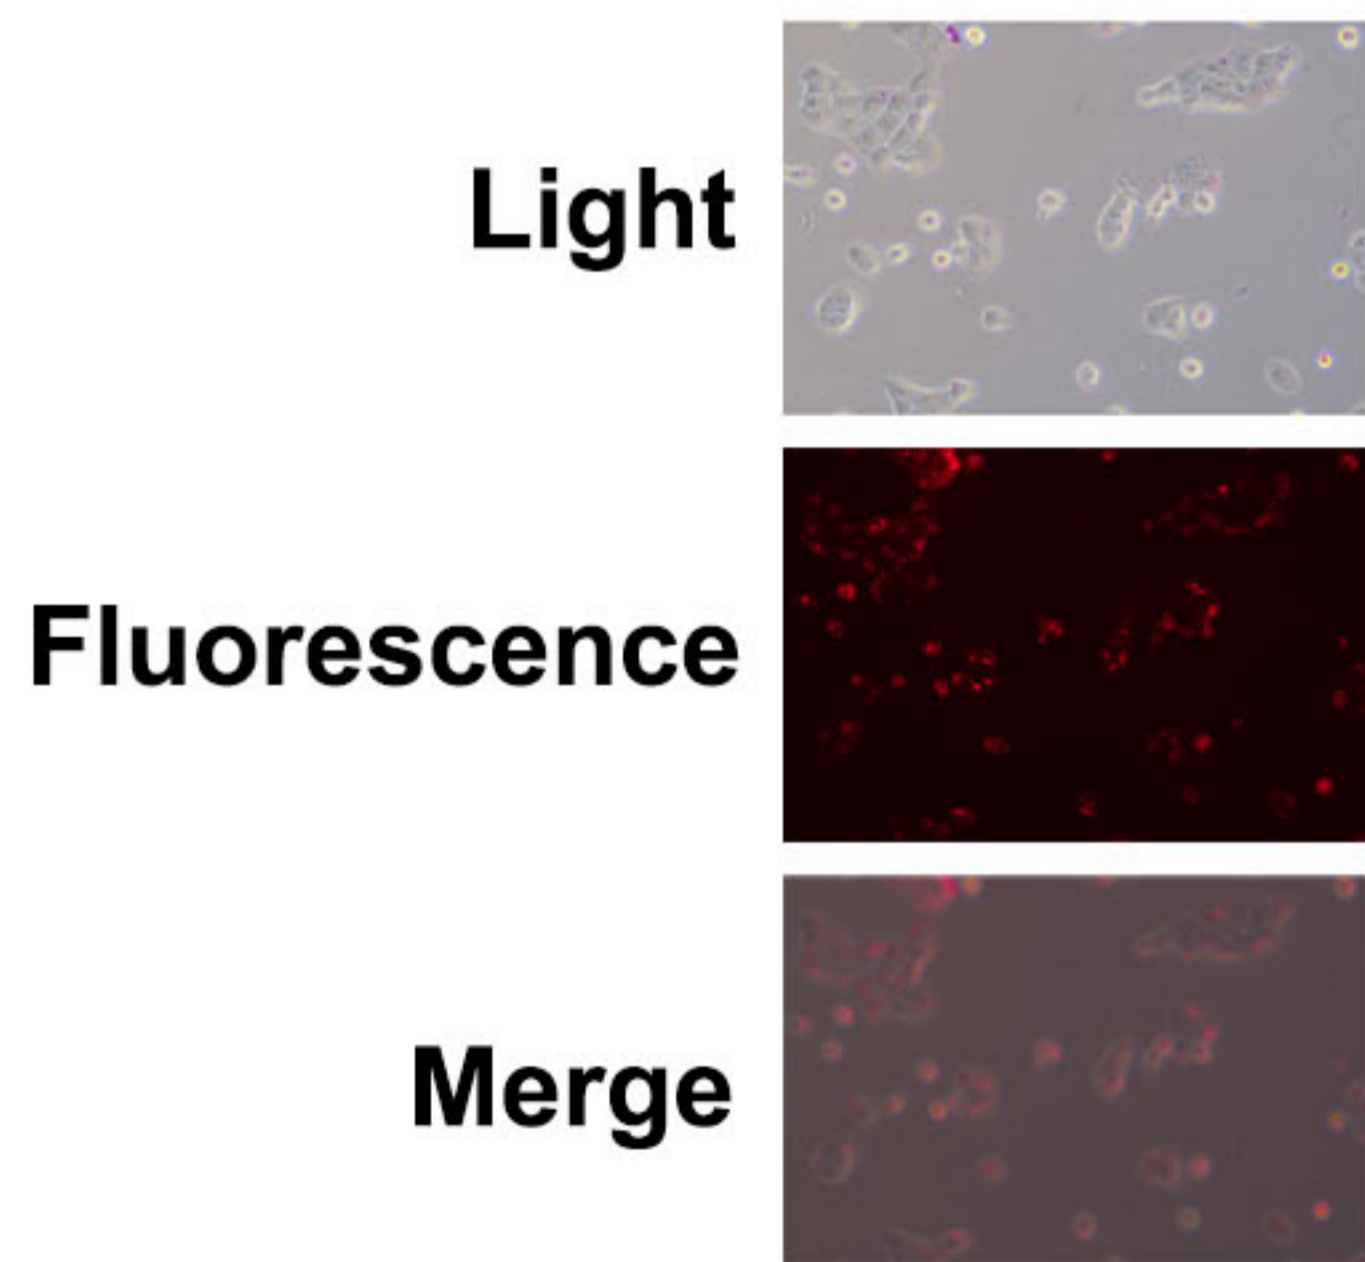

**E**
